# Supplementary material
Source: Elsevier journal article supplement (https://www.sciencedirect.com/science/article/pii/S1853002818300259)
Supplement: mmc1 [file S1853002818300259:mmc1.pdf]

## ANEXO: FICHA DE EVALUACIÓN

### MEMORIA LOGICA

| R.INM___/12 |                                                                                        | R.DIF___/12 |
|-------------|----------------------------------------------------------------------------------------|-------------|
| ---         | 1. <u>ROBERTO</u> tiene una familia grande, una mujer y <u>4 HIJOS</u>                 | ---         |
| ---         | 2. <u>LA MUJER</u> de Roberto quiere <u>CAMBIAR EL AUTO</u>                            | ---         |
| ---         | 3. Él está contento porque desde hace largo tiempo soñaba con                          | ---         |
| ---         | 4. tener <u>UN AUTO ROJO</u> con un <u>BAÚL</u> grande                                 | ---         |
| ---         | 5. Una mañana <u>SE LEVANTÓ TEMPRANO</u> para ir a la <u>AGENCIA DE VENTA DE AUTOS</u> | ---         |
| ---         | 6. El vendedor era amigo de la infancia                                                | ---         |
| ---         | 7. Roberto tuvo que <u>ESPERAR</u> porque había <u>MUCHOS CLIENTES</u>                 | ---         |
| ---         | 8. El vendedor que es <u>CHARLATÁN</u> , ese día estaba <u>ENOJADO</u>                 | ---         |
| ---         | 9. porque no tenía más autos para vender                                               | ---         |
| ---         | 10. Pero Roberto le dijo que en la agencia había un auto rojo                          | ---         |
| ---         | 11. El vendedor le explicó que no le había ofrecido ese auto                           | ---         |
| ---         | 12. simplemente porque estaba descompuesto                                             | ---         |

R. INM: Recuerdo Lógico Inmediato, R. DIF: Recuerdo Lógico Diferido

### APRENDIZAJE SERIAL

|              | AS1 | AS2 | AS3 | Rec Serial | REC/sem          | REC/elección múltiple                   | Rto |
|--------------|-----|-----|-----|------------|------------------|-----------------------------------------|-----|
| Banana       |     |     |     |            | Fruta            | manzana/banana/uva/naranja              |     |
| Avión        |     |     |     |            | Medio transporte | auto/tren/avión/barco                   |     |
| León         |     |     |     |            | Animal           | perro/gato/pájaro/león                  |     |
| Clavel       |     |     |     |            | Flor             | clavel/rosa/violeta/jazmín              |     |
| Serrucho     |     |     |     |            | Herramienta      | martillo/tenaza/serrucho/destornillador |     |
| Ingeniero    |     |     |     |            | Profesión        | médico/ingeniero/contador/abogado       |     |
| Tenis        |     |     |     |            | Deporte          | fútbol/básquet/tenis/natación           |     |
| Azul         |     |     |     |            | Color            | rojo/verde/amarillo/azul                |     |
| Silla        |     |     |     |            | Mueble           | silla/mesa/sillón/cama                  |     |
| Whisky       |     |     |     |            | Bebida           | vino/whisky/cerveza/coñac/              |     |
| Camisa       |     |     |     |            | Ropa             | pantalón/saco/camisa/pullover           |     |
| Regla        |     |     |     |            | Útil escolar     | lápiz/escuadra/compás/regla             |     |
| <b>TOTAL</b> |     |     |     |            |                  |                                         |     |

AS1: Aprendizaje Serial 1, AS2: Aprendizaje Serial 2, AS3: Aprendizaje Serial 3, Rec Serial: Recuerdo Serial, REC/Sem: Recuerdo con claves semánticas, REC/Elección múltiple: Reconocimiento con elección múltiple, Rto: Reconocimiento total. Sumatoria

de recuerdo serial, recuerdo con claves semánticas y reconocimiento entre elecciones múltiples.

Batería verbal de Eficacia Mnésica Signoret (modificación de Allegri y colaboradores).

Etapas en la Administración de la batería. En primer lugar se administran las pruebas de memoria lógica y episódica inmediatas. Seguidamente se realiza una actividad de interferencia (Span de dígitos o similar). En último lugar se solicita el recuerdo diferido de la historia y lista de palabras.

1. Memoria lógica inmediata (recuerdo de un relato)
2. Aprendizaje serial (recuerdo de una lista de palabras: AS1, AS2 y AS3)
3. Prueba distractora
4. Memoria lógica diferida (recuerdo de un relato)
5. Recuerdo serial (recuerdo libre de una lista de palabras)
6. Recuerdo con claves
7. Reconocimiento
